# Supplementary material for: ICan: An Integrated Co-Alteration Network to Identify Ovarian Cancer-Related Genes
Source: PLoS One. 2015 Mar 24;10(3):e0116095. doi: 10.1371/journal.pone.0116095 (PMC4372216; doi:10.1371/journal.pone.0116095)
Supplement: S7 Table — (XLSX) [file pone.0116095.s007.xlsx]

## Sheet: random_results
gene_symbol	RWR probability	P-value	FDR
AAAS	1.5e-05	0.946	1
AANAT	1.77e-05	0.131	0.776092
AARS	2.44e-05	0.837	1
AASDHPPT	3.4e-06	0.981	1
AATF	5.94e-05	0.197	0.808516
ABCA1	0.00121251	0.083	0.761665
ABCA3	6.11e-06	0.099	0.761665
ABCA7	2.4e-06	0.718	1
ABCB1	0.00117677	0.001	0.0409355
ABCB11	2.84e-08	0.997	1
ABCC2	0.00117309	0.071	0.761665
ABCC3	0	0.232	0.843576
ABCC8	9.89e-07	0.954	1
ABCD3	2.44e-06	0.74	1
ABCD4	1.32e-05	0.333	0.926519
ABCE1	0	0.187	0.805056
ABCF3	2.66e-05	0.402	0.963252
ABCG1	0	0.186	0.805056
ABCG2	0.0011627	0.023	0.386071
ABCG5	0	0.169	0.805056
ABI1	7.96e-05	0.6	1
ABI2	3.7e-06	1	1
ABI3	8.77e-06	0.964	1
ABL1	0.00123298	0.045	0.6075
ABL2	9.05e-05	0.141	0.793125
ABLIM1	8.04e-06	0.984	1
ABR	2.21e-06	0.904	1
ABRA	5.9e-07	0.968	1
ABT1	7.73e-07	0.758	1
ABTB1	4.46e-08	0.993	1
ABTB2	6.34e-06	0.695	1
ACAA2	1.98e-07	0.429	0.975629
ACAD8	2.13e-06	0.876	1
ACADVL	2.27e-05	0.887	1
ACAN	0.000406228	0.196	0.806498
ACBD3	3.42e-06	0.775	1
ACCN2	2.74e-06	0.979	1
ACCN3	7.62e-06	0.962	1
ACD	1.38e-05	0.631	1
ACE	0.000129017	0.127	0.776092
ACHE	9.15e-06	0.527	1
ACLY	4.49e-06	0.805	1
ACOT7	1.54e-07	0.998	1
ACOX1	1.35e-06	0.746	1
ACOX3	5.1e-08	0.698	1
ACP1	2.73e-05	0.165	0.805056
ACP5	0.000137408	0.195	0.806498
ACP6	2.85e-07	0.809	1
ACR	8.05e-07	0.669	1
ACSS1	0	0.183	0.805056
ACTA1	8.22e-05	0.996	1
ACTA2	2.92e-05	0.555	1
ACTB	0.000198682	0.968	1
ACTG1	9.05e-05	0.902	1
ACTG2	4.26e-05	0.482	1
ACTL6A	5.23e-05	0.604	1
ACTL6B	2.98e-07	0.285	0.880392
ACTL7A	2.21e-07	0.962	1
ACTN1	6.9e-05	0.966	1
ACTN2	5.14e-05	0.945	1
ACTN3	1.01e-05	0.537	1
ACTN4	7.05e-05	0.807	1
ACTR1A	3.09e-05	0.916	1
ACTR1B	4.4e-07	1	1
ACTR3	2.92e-06	0.632	1
ACTR3B	1.72e-07	0.359	0.941652
ACTR5	1.81e-05	0.304	0.899664
ACTR6	9.76e-06	0.598	1
ACVR1	0.00170416	0.016	0.311411
ACVR1B	0.000221987	0.102	0.761665
ACVR1C	7.04e-05	0.275	0.868962
ACVR2A	0.00140408	0	0
ACVR2B	0.000188308	0.202	0.809067
ACVRL1	0.000182669	0.093	0.761665
ACY1	1.34e-07	0.417	0.968155
ADA	0.00120223	0.025	0.402602
ADAM10	7.58e-05	0.142	0.793125
ADAM12	7.43e-05	0.148	0.804679
ADAM15	3.69e-05	0.444	0.987445
ADAM17	0.000183619	0.086	0.761665
ADAM19	4.08e-06	0.522	1
ADAM2	3.23e-05	0.179	0.805056
ADAM22	4.26e-06	0.912	1
ADAM23	1.45e-05	0.117	0.764537
ADAM33	9.03e-07	0.997	1
ADAM8	0.00117313	0.005	0.145528
ADAM9	0.000119455	0.094	0.761665
ADAMTS1	1.94e-05	0.305	0.89973
ADAMTS13	6.44e-07	0.448	0.989969
ADAMTS4	3.57e-05	0.641	1
ADAMTS5	9.62e-05	0.11	0.761665
ADAMTSL4	4.47e-06	0.939	1
ADAR	0.000178375	0.098	0.761665
ADCK1	2.88e-07	0.798	1
ADCY2	1.06e-05	0.381	0.953627
ADCY5	3.41e-05	0.31	0.904761
ADCY6	2.05e-05	0.313	0.910167
ADCY7	3.13e-05	0.107	0.761665
ADCYAP1	4.27e-06	0.726	1
ADD1	3.39e-05	0.321	0.919524
ADD3	7.28e-07	0.846	1
ADI1	2.93e-05	0.115	0.761665
ADIPOQ	0.000368719	0.239	0.849555
ADIPOR1	1.48e-06	0.275	0.868962
ADORA2A	0.000160107	0.097	0.761665
ADORA2B	3.51e-05	0.268	0.868962
ADPRHL2	3.15e-07	0.915	1
ADRA1A	3.77e-05	0.274	0.868962
ADRA1B	5.76e-06	0.91	1
ADRA2A	2.47e-06	0.871	1
ADRA2B	1.1e-06	0.843	1
ADRA2C	2.73e-06	0.909	1
ADRB2	5.43e-05	0.668	1
ADRB3	6.99e-06	0.461	0.993224
ADRBK1	0.000141738	0.508	1
ADRBK2	1.22e-06	0.606	1
ADRM1	6.34e-05	0.153	0.805056
AEBP1	1.06e-06	0.763	1
AFAP1	4.06e-06	0.983	1
AFF1	3.86e-06	0.852	1
AFTPH	1.55e-06	0.705	1
AGA	6.09e-05	0.108	0.761665
AGER	0.00119153	0.031	0.471691
AGGF1	1.79e-06	0.68	1
AGK	1.34e-06	0.69	1
AGL	2.47e-07	0.736	1
AGPAT1	4.41e-07	0.681	1
AGPAT6	1.8e-06	0.347	0.933246
AGPS	5.65e-09	0.897	1
AGR2	1.94e-06	0.991	1
AGRP	2.53e-07	0.898	1
AGT	5.86e-05	0.501	1
AGTPBP1	2.61e-06	0.888	1
AGTR1	3.68e-05	0.566	1
AGXT	6.07e-07	0.804	1
AHCYL1	2.75e-07	0.86	1
AHNAK	3.3e-06	0.327	0.92173
AHR	0.00120472	0.061	0.728898
AHSA1	5.27e-07	0.741	1
AHSA2	2.11e-06	0.307	0.89973
AHSG	1.52e-05	0.386	0.956062
AIFM2	0.00116605	0	0
AIP	4.03e-05	0.25	0.862561
AJAP1	8.11e-06	0.12	0.76754
AK1	1.51e-06	0.493	1
AK2	1.2e-05	0.116	0.764537
AK5	2.56e-07	0.89	1
AKAP1	1.61e-05	0.554	1
AKAP10	1.81e-06	0.819	1
AKAP11	4.62e-06	0.633	1
AKAP12	3.63e-06	0.974	1
AKAP13	4.8e-05	0.37	0.94778
AKAP3	1.35e-06	0.995	1
AKAP5	1.36e-05	0.107	0.761665
AKAP8L	1.07e-05	0.744	1
AKAP9	4.81e-05	0.551	1
AKR1A1	2.8e-08	0.875	1
AKR1B1	2.86e-08	0.993	1
AKR7A2	4.38e-07	0.221	0.827283
AKT1	0.00178252	0.026	0.415542
AKT1S1	2.75e-05	0.202	0.809067
AKT2	0.00131978	0.018	0.337899
AKT3	2.3e-05	0.133	0.781375
AKTIP	0.00118639	0.081	0.761665
ALAS1	2.39e-05	0.186	0.805056
ALCAM	1.2e-06	0.145	0.797249
ALDH2	4.89e-05	0.434	0.97893
ALDH7A1	3.85e-05	0.128	0.776092
ALDH9A1	2.66e-06	0.182	0.805056
ALDOA	3.94e-05	0.79	1
ALDOB	2.83e-06	0.802	1
ALDOC	1.02e-06	0.669	1
ALG2	1.75e-07	0.991	1
ALK	1.48e-05	0.33	0.924845
ALOX12	8.33e-06	0.57	1
ALOX15	1.95e-06	0.388	0.956062
ALOX5	0.00123786	0.102	0.761665
ALPP	8.65e-07	0.813	1
ALS2CR11	1.9e-05	0.23	0.843068
ALS2CR8	6.95e-06	0.138	0.789549
ALX1	6.34e-06	0.373	0.948951
ALX4	1.25e-06	0.822	1
AMBP	1.91e-05	0.111	0.761665
AMFR	2.07e-06	0.438	0.981324
AMH	0.00133571	0	0
AMHR2	0.00122427	0.001	0.0409355
AMICA1	3.57e-05	0.141	0.793125
AMN	5.5e-06	0.794	1
AMOTL2	2.01e-06	0.719	1
AMPD1	2.18e-06	0.387	0.956062
AMPH	1.63e-05	0.82	1
AMY2A	2.31e-07	0.354	0.937059
ANAPC1	8.23e-05	0.292	0.885631
ANAPC10	7.01e-05	0.216	0.824125
ANAPC11	8.92e-05	0.19	0.805056
ANAPC2	6.81e-05	0.314	0.910571
ANAPC4	6.16e-05	0.509	1
ANAPC5	6.86e-05	0.338	0.928403
ANG	5.84e-06	0.496	1
ANGPT1	0.00126633	0.002	0.0733526
ANGPT4	2.46e-05	0.092	0.761665
ANGPTL1	6.36e-07	0.421	0.968193
ANGPTL3	9.5e-06	0.175	0.805056
ANGPTL4	1.86e-05	0.897	1
ANK1	2.73e-05	0.654	1
ANK2	1.77e-05	0.499	1
ANKRA2	2.79e-06	0.415	0.968155
ANKRD11	2.43e-06	0.844	1
ANKRD13A	3.87e-07	0.83	1
ANKRD13B	1.9e-07	0.919	1
ANKRD2	1.13e-06	0.988	1
ANKRD23	2.61e-07	0.999	1
ANKRD27	4.64e-07	0.993	1
ANKRD7	1.73e-06	0.594	1
ANKS1A	8.01e-07	0.999	1
ANKS1B	1.43e-07	1	1
ANKZF1	8.43e-07	0.999	1
ANP32B	1.98e-05	0.908	1
ANPEP	9.56e-06	0.449	0.989969
ANTXR1	1.57e-05	0.098	0.761665
ANXA11	1.6e-06	0.991	1
ANXA13	2.5e-06	0.705	1
ANXA2	8.1e-05	0.283	0.879351
ANXA4	3.82e-07	0.354	0.937059
ANXA5	3.78e-05	0.233	0.845274
ANXA9	1.02e-06	0.784	1
AOC3	8.77e-07	0.237	0.849105
AP1B1	2.16e-05	0.454	0.99127
AP1G1	2.65e-05	0.726	1
AP1G2	9.53e-07	0.972	1
AP1M1	1.99e-05	0.825	1
AP1S1	3.78e-07	0.957	1
AP2A2	7.77e-06	0.793	1
AP2B1	0.000101793	0.639	1
AP2S1	2.02e-05	0.467	0.995336
AP3B1	8.79e-06	0.39	0.956163
AP3B2	2.01e-05	0.269	0.868962
AP3D1	5.69e-05	0.465	0.995336
AP3M1	2.73e-06	0.663	1
AP3S1	9.87e-06	0.466	0.995336
AP4B1	1.06e-05	0.277	0.872241
AP4M1	1.31e-06	0.809	1
APAF1	0.00122462	0.053	0.665911
APBA1	5.23e-06	0.923	1
APBA2	5.8e-06	0.415	0.968155
APBB1	2.41e-05	0.936	1
APC	0.0012501	0.08	0.761665
APC2	7.3e-06	0.298	0.891892
APCS	1.05e-05	0.763	1
APEH	2.31e-05	0.178	0.805056
APEX1	0.00160946	0	0
APH1B	2.66e-05	0.471	0.998946
API5	1.05e-05	0.094	0.761665
APIP	1.35e-05	0.225	0.837808
APITD1	0.000220526	0.097	0.761665
APLP1	8.93e-05	0.274	0.868962
APLP2	1.45e-05	0.314	0.910571
APOA1	0.000229596	0.718	1
APOA1BP	9.13e-07	0.832	1
APOA2	1.13e-05	0.915	1
APOA4	1.4e-05	0.824	1
APOA5	2.01e-06	0.928	1
APOB	1.6e-05	0.931	1
APOBEC1	8.09e-07	0.415	0.968155
APOBEC3C	1.62e-05	0.139	0.790991
APOC2	4.14e-06	0.935	1
APOC3	2.48e-06	0.942	1
APOD	1.55e-06	0.618	1
APOE	1.4e-05	0.948	1
APOH	6.5e-06	0.341	0.931401
APOM	1.05e-09	0.627	1
APPBP2	7.23e-06	0.928	1
APPL1	4.73e-05	0.277	0.872241
APPL2	1.62e-06	0.796	1
APTX	0.00140344	0.022	0.37727
AQP1	4.25e-06	1	1
AQP3	8.07e-07	1	1
AQP4	7.53e-06	0.414	0.968155
AQP5	2.78e-07	1	1
ARC	4.24e-08	0.999	1
ARCN1	1.52e-06	0.834	1
ARF4	1.77e-05	0.1	0.761665
ARFGAP1	8.32e-06	0.771	1
ARFGEF1	0.000163663	0.175	0.805056
ARFIP1	4.8e-07	0.686	1
ARFIP2	4.5e-06	0.904	1
ARG1	1.77e-05	0.533	1
ARHGAP1	1.35e-05	0.903	1
ARHGAP15	2.16e-06	0.463	0.994494
ARHGAP19	3.22e-07	0.258	0.868122
ARHGAP21	3.65e-06	0.866	1
ARHGAP24	1.78e-05	0.145	0.797249
ARHGAP26	1.11e-05	0.239	0.849555
ARHGAP5	1.48e-05	0.722	1
ARHGDIA	7.53e-05	0.307	0.89973
ARHGDIB	7.43e-06	0.732	1
ARHGDIG	1.5e-06	0.867	1
ARHGEF10	1.71e-06	0.834	1
ARHGEF10L	2.39e-06	0.772	1
ARHGEF11	6.36e-06	0.874	1
ARHGEF12	2.88e-05	0.247	0.857808
ARHGEF15	9.1e-06	0.38	0.953004
ARHGEF17	2.14e-06	0.834	1
ARHGEF2	0.00117628	0.086	0.761665
ARHGEF3	8.32e-07	0.834	1
ARHGEF4	1.17e-05	0.257	0.867375
ARHGEF7	3.79e-05	0.659	1
ARID1A	0.00117159	0.103	0.761665
ARID1B	3.4e-05	0.634	1
ARID3A	4.73e-05	0.275	0.868962
ARID3B	8.56e-07	0.091	0.761665
ARID4B	9.21e-07	0.736	1
ARID5A	6.84e-07	0.998	1
ARIH1	1.36e-06	0.869	1
ARIH2	3.29e-05	0.693	1
ARL1	5.98e-07	0.932	1
ARL11	0.00115942	0.025	0.402602
ARL2	3.38e-05	0.31	0.904761
ARL2BP	2.88e-06	0.538	1
ARL3	1.14e-05	0.476	1
ARL4C	2.17e-07	0.997	1
ARL4D	1.79e-05	0.809	1
ARL5A	1.05e-05	0.398	0.961145
ARL5B	1.3e-06	0.747	1
ARL6	1.65e-06	0.665	1
ARL6IP1	2.36e-05	0.331	0.925196
ARL6IP5	4.31e-07	0.878	1
ARL8B	4.69e-07	0.812	1
ARMC7	7.97e-07	0.765	1
ARNT2	6.57e-06	0.347	0.933246
ARNTL	0.000176162	0.405	0.963526
ARNTL2	2.27e-05	0.18	0.805056
ARPC1B	4.23e-06	0.883	1
ARPC2	4.73e-06	0.886	1
ARPC3	3.96e-05	0.558	1
ARRB2	0.000177568	0.662	1
ARSA	3.22e-06	0.862	1
ART1	7.83e-06	0.102	0.761665
ARTN	0	0.161	0.805056
ARVCF	1.14e-05	0.379	0.953004
ASAH1	4.08e-06	0.273	0.868962
ASB13	1.33e-05	0.609	1
ASB4	4.98e-06	0.614	1
ASB8	1.21e-06	0.443	0.985912
ASCC1	8.52e-07	0.66	1
ASCC3	3.89e-05	0.737	1
ASCL1	2.74e-05	0.252	0.864759
ASCL2	2.28e-08	0.983	1
ASF1B	2.31e-06	0.402	0.963252
ASH1L	1.48e-06	0.409	0.96652
ASH2L	1.04e-05	0.999	1
ASL	2.41e-07	0.812	1
ASNS	1.15e-06	0.851	1
ASPM	5.65e-07	0.134	0.78226
ASS1	5.08e-05	0.203	0.809067
ATAD2	1.26e-05	0.087	0.761665
ATAD5	2.31e-05	0.093	0.761665
ATF1	0.00131988	0.004	0.124412
ATF2	0.000439292	0.186	0.805056
ATF4	9.65e-05	0.347	0.933246
ATF5	4.71e-05	0.282	0.877103
ATF6	1.96e-06	0.951	1
ATF7IP2	4.03e-06	0.577	1
ATG10	4.57e-08	1	1
ATG12	9.32e-07	1	1
ATG3	5.14e-07	0.987	1
ATG7	1.34e-07	0.997	1
ATG9A	7.14e-07	0.586	1
ATM	0.00213893	0	0
ATOH1	2.95e-06	0.811	1
ATOX1	2.12e-06	0.489	1
ATP1B1	2.17e-06	0.838	1
ATP1B2	0.0011773	0.08	0.761665
ATP2A2	1.3e-05	0.212	0.817217
ATP2A3	1.29e-05	0.121	0.770055
ATP2B1	3.11e-06	0.909	1
ATP2B2	4.84e-06	0.976	1
ATP5A1	2.81e-05	0.722	1
ATP5B	3.24e-06	0.966	1
ATP5C1	5.07e-07	0.794	1
ATP5D	9.73e-07	0.747	1
ATP5E	1.15e-06	0.742	1
ATP5F1	1.13e-06	0.77	1
ATP5G1	6.2e-07	0.826	1
ATP5H	3.78e-07	0.803	1
ATP5I	7.71e-07	0.792	1
ATP5J	4.81e-06	0.729	1
ATP5L	9.2e-07	0.785	1
ATP6V0B	8.06e-06	0.545	1
ATP6V0C	4.59e-06	0.549	1
ATP6V0D1	1.81e-06	0.923	1
ATP6V0E1	5.32e-07	0.416	0.968155
ATP6V1A	5.17e-06	0.551	1
ATP6V1B1	2.04e-06	0.836	1
ATP6V1D	8.93e-05	0.287	0.880994
ATP6V1E1	1.59e-05	0.413	0.968155
ATP6V1F	5.95e-06	0.546	1
ATP6V1H	5.74e-06	0.629	1
ATP7B	1.27e-06	0.921	1
ATPIF1	2.45e-07	0.997	1
ATR	0.00158687	0	0
ATRIP	0.00035647	0.095	0.761665
ATRNL1	2.13e-07	0.951	1
ATXN1	0.000125168	0.998	1
ATXN2	4.63e-05	0.87	1
ATXN2L	2.68e-05	0.613	1
ATXN3	2.94e-05	0.258	0.868122
ATXN7	2.19e-05	0.087	0.761665
AUP1	8.02e-06	0.491	1
AURKA	0.00134949	0.01	0.229891
AURKB	0.000113679	0.756	1
AVEN	3.19e-05	0.13	0.776092
AVIL	1.12e-06	0.236	0.849105
AVP	1.17e-05	0.619	1
AVPR1A	4.06e-06	0.688	1
AVPR1B	2.37e-06	0.587	1
AXIN1	0.000404748	0.102	0.761665
AXIN2	0.00121071	0.023	0.386071
AXL	2.14e-05	0.564	1
AZGP1	5.67e-06	0.112	0.761665
AZI2	5.49e-06	0.716	1
AZIN1	4.8e-06	0.238	0.849331
AZU1	0.000146317	0.172	0.805056
B2M	0.000262051	0.586	1
B3GNT4	2.67e-07	0.981	1
B4GALT3	2.19e-06	0.239	0.849555
B9D2	3.57e-05	0.699	1
BAALC	4.76e-08	0.996	1
BACE1	4.66e-05	0.7	1
BACH1	0.0011808	0.042	0.578069
BACH2	2.43e-05	0.284	0.880392
BAD	2.19e-05	0.46	0.992418
BAG1	7.02e-05	0.101	0.761665
BAG2	8.4e-07	0.629	1
BAG3	6.31e-06	0.351	0.935668
BAG4	2.03e-05	0.627	1
BAI1	3.23e-06	0.983	1
BAI2	1.73e-06	0.923	1
BAIAP2	3.69e-05	0.774	1
BAK1	2.98e-05	0.497	1
BAMBI	8.06e-05	0.482	1
BANF1	9.75e-07	0.653	1
BANK1	2.73e-07	0.957	1
BANP	1.08e-06	0.958	1
BARD1	0.00150313	0.009	0.219635
BARX2	3.12e-08	0.835	1
BATF	6.65e-05	0.105	0.761665
BAX	5.06e-05	0.745	1
BAZ1A	2.24e-06	0.98	1
BAZ1B	1.73e-05	0.337	0.92686
BBC3	2.34e-05	0.428	0.974752
BBOX1	2.5e-07	0.943	1
BCAN	0.000138731	0.174	0.805056
BCAR1	0.000201006	0.12	0.76754
BCAR3	6.91e-07	0.574	1
BCAS1	1.27e-07	0.303	0.899221
BCAS2	3.7e-05	0.1	0.761665
BCAT1	9.74e-06	0.105	0.761665
BCCIP	0.00124481	0.009	0.219635
BCKDHA	2.09e-06	0.537	1
BCKDHB	1.23e-06	0.537	1
BCL10	7.81e-05	0.463	0.994494
BCL11A	8.76e-07	0.495	1
BCL11B	4.97e-06	0.517	1
BCL2	0.00153486	0.03	0.464268
BCL2A1	1.19e-05	0.498	1
BCL2L1	0.00133325	0.065	0.761665
BCL2L10	3.62e-05	0.131	0.776092
BCL2L14	2.63e-05	0.091	0.761665
BCL2L2	3.49e-06	0.661	1
BCL3	5.44e-05	0.107	0.761665
BCL6	7.26e-05	0.15	0.805056
BCL7A	1.48e-06	0.409	0.96652
BCL9	4.6e-06	0.597	1
BCL9L	4.56e-06	0.178	0.805056
BCLAF1	2.7e-05	0.204	0.810507
BCMO1	2.75e-07	0.436	0.97961
BCS1L	1.11e-06	0.596	1
BDKRB2	6.43e-05	0.344	0.933246
BDNF	9.74e-05	0.341	0.931401
BECN1	2.07e-05	0.442	0.985912
BEGAIN	2.77e-05	0.659	1
BET1	4.8e-07	0.999	1
BFAR	1.8e-05	0.096	0.761665
BGLAP	5.18e-05	0.548	1
BICD2	3.6e-05	0.18	0.805056
BID	0.000145775	0.13	0.776092
BIK	1.14e-05	0.369	0.94778
BIN1	6.8e-05	0.443	0.985912
BIRC2	0.000306647	0.142	0.793125
BIRC3	0.000168297	0.129	0.776092
BIRC5	0.00124984	0.039	0.552355
BIRC6	1.05e-05	0.861	1
BIRC7	4.5e-06	0.801	1
BLK	1.26e-05	0.522	1
BLM	0.00188562	0	0
BLMH	1.58e-06	0.95	1
BLNK	1.13e-05	0.925	1
BLOC1S1	1.09e-05	0.764	1
BLOC1S2	4.52e-07	0.884	1
BLVRB	2.5e-06	0.239	0.849555
BLZF1	2.4e-05	0.326	0.92173
BMF	1.87e-05	0.199	0.808795
BMI1	4.32e-05	0.618	1
BMP2	4.32e-05	0.626	1
BMP2K	2.58e-06	0.418	0.968155
BMP3	1.22e-05	0.336	0.926519
BMP4	0.00123209	0.034	0.501698
BMP6	4.24e-05	0.324	0.921414
BMP7	0.000128676	0.107	0.761665
BMPR1A	6.55e-05	0.246	0.85715
BMPR1B	0.000190825	0.549	1
BMPR2	0.00011453	0.909	1
BNC2	0.00117048	0	0
BNIP1	9.29e-06	0.212	0.817217
BNIP2	3.29e-05	0.366	0.945165
BNIP3	2.02e-05	0.341	0.931401
BNIP3L	1.32e-06	0.093	0.761665
BNIPL	5.52e-06	0.424	0.971922
BOC	9.31e-06	0.485	1
BOP1	0	0.186	0.805056
BPGM	1.92e-07	0.888	1
BPTF	0.000115751	0.108	0.761665
BRCA1	0.00194218	0	0
BRCA2	0.00159497	0	0
BRD1	5.58e-06	0.673	1
BRD2	4.95e-05	0.281	0.87571
BRD8	5.76e-05	0.099	0.761665
BRE	0.00116015	0.07	0.761665
BRF1	4.87e-05	0.3	0.894922
BRF2	3.16e-05	0.477	1
BRIP1	0.00119335	0.005	0.145528
BRP44	2.72e-07	0.919	1
BRP44L	2.41e-07	0.826	1
BRSK2	7.43e-05	0.126	0.776092
BSCL2	0	0.234	0.845518
BSDC1	1.1e-06	0.593	1
BSN	3.49e-08	0.997	1
BTAF1	1.56e-06	0.832	1
BTBD1	2.56e-06	0.266	0.868777
BTBD2	2.67e-05	0.889	1
BTF3	8.38e-06	0.213	0.818586
BTG2	1.04e-05	0.885	1
BTG3	9.04e-07	0.997	1
BTN1A1	0	0.172	0.805056
BTRC	0.00127034	0.002	0.0733526
BUB1	0.00122422	0.079	0.761665
BUB1B	0.00123366	0.05	0.650102
BUB3	0.000187847	0.093	0.761665
BYSL	1.11e-06	0.959	1
BZRAP1	0	0.243	0.854404
C10orf12	6.36e-07	0.672	1
C10orf35	0	0.178	0.805056
C10orf88	6.08e-07	0.891	1
C11orf1	1.91e-06	0.622	1
C11orf49	2.13e-06	0.981	1
C11orf54	2.02e-05	0.207	0.81266
C11orf61	1.6e-08	0.89	1
C11orf68	2.36e-07	0.995	1
C12orf12	2.17e-06	0.933	1
C12orf35	2.24e-06	0.334	0.926519
C14orf1	2.93e-05	0.986	1
C15orf29	2.82e-07	0.974	1
C15orf39	3.05e-07	0.919	1
C16orf45	7.42e-08	0.991	1
C16orf48	6.28e-06	0.997	1
C16orf57	2.05e-07	0.745	1
C16orf59	1.63e-06	0.668	1
C16orf70	1.59e-06	0.503	1
C17orf65	2.59e-05	0.153	0.805056
C18orf56	3.14e-07	0.996	1
C19orf10	1e-06	0.997	1
C19orf43	1.19e-07	0.877	1
C19orf57	7.41e-07	0.977	1
C1D	1.56e-05	0.123	0.77042
C1orf114	5.82e-08	0.662	1
C1orf123	6.57e-06	0.108	0.761665
C1orf124	2.47e-06	0.431	0.977026
C1orf174	7.96e-06	0.695	1
C1orf182	1.93e-07	0.996	1
C1orf216	1.36e-07	0.997	1
C1orf63	1.94e-06	0.252	0.864759
C1orf65	1.74e-06	1	1
C1orf94	3.08e-06	1	1
C1QA	2.43e-05	0.733	1
C1QB	1.15e-05	0.56	1
C1QBP	7.55e-05	0.698	1
C1QC	0.000112438	0.175	0.805056
C1QTNF1	1.16e-06	0.997	1
C1RL	3.8e-08	0.514	1
C1S	5.04e-05	0.376	0.951876
C2	1.5e-05	0.155	0.805056
C20orf195	1.42e-06	0.992	1
C20orf27	1.26e-08	0.989	1
C20orf30	5.79e-07	0.81	1
C20orf4	3.4e-07	0.999	1
C21orf63	1.34e-07	0.526	1
C2orf18	7.94e-06	0.809	1
C2orf29	1.3e-06	0.975	1
C2orf44	2.45e-06	0.669	1
C3	0.00130185	0.071	0.761665
C3orf19	1.37e-08	0.989	1
C4BPA	2.09e-05	0.326	0.92173
C4orf17	7.53e-07	1	1
C4orf34	6.33e-07	0.604	1
C5	2.62e-05	0.489	1
C5AR1	5.66e-06	0.605	1
C5orf22	6.52e-07	0.778	1
C5orf25	1.46e-07	0.994	1
C6	1.5e-05	0.507	1
C6orf165	1.9e-07	0.997	1
C6orf47	1.39e-05	0.121	0.770055
C6orf62	1.78e-07	0.741	1
C7	2.82e-06	0.598	1
C7orf25	2.33e-07	0.944	1
C7orf30	1.34e-07	0.905	1
C7orf34	2.47e-08	0.645	1
C7orf43	0	0.154	0.805056
C7orf50	1.84e-07	0.995	1
C8A	1.72e-06	0.632	1
C8G	2.41e-06	0.636	1
C9	8.23e-06	0.64	1
C9orf100	2.05e-06	0.846	1
C9orf16	6.84e-08	0.998	1
C9orf24	3.06e-05	0.12	0.76754
C9orf25	5.9e-07	0.728	1
C9orf46	9.69e-06	0.098	0.761665
C9orf78	9.64e-07	0.648	1
C9orf9	2.41e-06	0.759	1
CA12	7.79e-07	0.895	1
CA2	5.8e-06	0.845	1
CA4	9.41e-07	0.694	1
CA6	3.26e-07	0.611	1
CA9	1.52e-05	0.095	0.761665
CAB39	8.25e-05	0.157	0.805056
CABP1	7.34e-07	0.981	1
CABP2	3.32e-06	0.573	1
CABYR	1.83e-06	0.251	0.864601
CACHD1	4.7e-05	0.276	0.87082
CACNA1A	1.07e-06	1	1
CACNA1C	2.9e-06	0.991	1
CACNA1D	7.27e-07	0.092	0.761665
CACNA1G	6.5e-06	0.397	0.959606
CACNA1H	1.87e-08	0.71	1
CACNA1S	1.59e-06	0.749	1
CACNB3	4.57e-07	0.995	1
CACNB4	3.93e-06	0.94	1
CACNG2	2.13e-06	0.999	1
CACYBP	5.52e-06	0.815	1
CAD	4.4e-05	0.676	1
CADM1	1.24e-06	0.843	1
CADPS	1.99e-05	0.248	0.85893
CADPS2	5.13e-05	0.162	0.805056
CALB1	1.92e-06	0.607	1
CALB2	1.01e-06	0.992	1
CALCA	0.00122258	0.036	0.519136
CALCOCO1	4.35e-05	0.376	0.951876
CALCOCO2	8.02e-05	0.818	1
CALCR	0.000137591	0.096	0.761665
CALCRL	0.00010967	0.117	0.764537
CALD1	8.37e-06	0.735	1
CALM1	0.000119717	0.983	1
CALML3	2.18e-07	0.796	1
CALML5	0	0.19	0.805056
CALR	0.000198992	0.121	0.770055
CAMK1	1.82e-05	0.451	0.989969
CAMK1D	8.53e-08	0.593	1
CAMK2D	1.21e-05	0.514	1
CAMK2G	8.63e-05	0.405	0.963526
CAMK2N1	2.68e-07	0.89	1
CAMK4	8.23e-06	0.764	1
CAMKK1	4.23e-06	0.593	1
CAMLG	3.24e-06	0.406	0.964459
CAMP	4.67e-06	0.396	0.959606
CAMTA2	5.02e-07	0.921	1
CAND1	1.57e-05	0.322	0.921141
CANX	0.000196785	0.582	1
CAP1	1.25e-05	0.364	0.944227
CAP2	2.16e-06	0.868	1
CAPG	5.19e-08	0.779	1
CAPN1	0.000169402	0.596	1
CAPN3	7.27e-06	0.695	1
CAPNS1	1.34e-05	0.494	1
CAPZA1	3.2e-06	0.913	1
CARD11	2.08e-05	0.348	0.933246
CARD14	2.32e-05	0.311	0.906845
CARD6	2.48e-06	0.304	0.899664
CARD8	4.01e-06	0.675	1
CARD9	5.15e-06	0.689	1
CARM1	7.3e-05	0.332	0.925545
CASC3	9.46e-06	0.995	1
CASC5	4.42e-05	0.677	1
CASP1	8.44e-05	0.222	0.829558
CASP10	0.00131193	0.009	0.219635
CASP14	2.13e-05	0.259	0.868122
CASP2	2.44e-05	0.558	1
CASP3	0.000493786	0.492	1
CASP4	7.67e-05	0.237	0.849105
CASP5	0.00117915	0.04	0.560265
CASP6	0.000112981	0.395	0.959523
CASP8	0.00146831	0.032	0.48
CASP8AP2	9.83e-06	0.249	0.860046
CASP9	0.000101532	0.524	1
CASQ2	4.65e-06	0.347	0.933246
CAT	5.51e-06	0.377	0.951876
CAV1	0.00177662	0.004	0.124412
CAV2	2.69e-05	0.462	0.994028
CAV3	1.59e-06	0.385	0.956062
CBFA2T2	1.57e-05	0.614	1
CBFA2T3	3.99e-06	0.961	1
CBFB	1.55e-05	0.513	1
CBL	0.000327503	0.503	1
CBLB	6.18e-05	0.423	0.96998
CBLC	5.81e-06	0.472	0.998946
CBLL1	1.26e-05	0.104	0.761665
CBLN2	0	0.256	0.866766
CBLN3	0	0.256	0.866766
CBR1	6.29e-06	0.088	0.761665
CBR3	4.28e-07	0.83	1
CBS	4.37e-07	0.99	1
CBX1	0.000152891	0.203	0.809067
CBX2	5.79e-06	0.705	1
CBX4	4.79e-05	0.48	1
CBX5	0.000188443	0.292	0.885631
CBX7	3.29e-06	0.509	1
CBY1	1.6e-06	0.725	1
CC2D1A	0.0011947	0.018	0.337899
CCAR1	3.09e-05	0.88	1
CCDC106	9.54e-06	0.771	1
CCDC107	1.62e-06	0.997	1
CCDC109B	1.27e-06	0.873	1
CCDC112	2.38e-07	0.995	1
CCDC116	8.51e-07	1	1
CCDC127	5.05e-06	0.43	0.977026
CCDC130	3.85e-06	0.701	1
CCDC14	1.08e-06	0.997	1
CCDC17	1.53e-05	0.082	0.761665
CCDC47	1.12e-05	0.227	0.841081
CCDC7	2.25e-08	0.973	1
CCDC85B	9.12e-05	0.995	1
CCDC86	3.84e-07	0.936	1
CCDC88B	2.07e-06	0.426	0.972991
CCDC90B	2.99e-05	0.612	1
CCDC92	3.61e-06	0.26	0.868367
CCDC99	5.37e-05	0.425	0.972808
CCKAR	3.04e-07	0.483	1
CCKBR	2.25e-06	0.485	1
CCL11	0.00121678	0.02	0.354469
CCL13	0.0011761	0.003	0.102339
CCL15	5.34e-07	0.696	1
CCL16	3.2e-07	0.696	1
CCL2	6.03e-05	0.159	0.805056
CCL20	1.03e-08	0.972	1
CCL21	2.7e-05	0.387	0.956062
CCL22	8.16e-05	0.196	0.806498
CCL23	3.24e-07	0.696	1
CCL25	2.87e-06	0.45	0.989969
CCL26	2.89e-06	0.621	1
CCL28	1.42e-07	0.45	0.989969
CCL5	6.99e-05	0.295	0.888782
CCL7	0.00126026	0.001	0.0409355
CCL8	3.56e-05	0.162	0.805056
CCNA1	0.00115993	0.01	0.229891
CCNA2	0.00140169	0	0
CCNB1	0.00140058	0.02	0.354469
CCNB1IP1	5.31e-06	0.228	0.841081
CCNC	4.03e-05	0.652	1
CCND1	0.00151887	0.003	0.102339
CCND2	0.00127028	0.02	0.354469
CCNDBP1	9.71e-06	0.221	0.827283
CCNE2	0.00123038	0.005	0.145528
CCNG1	0.00120289	0.007	0.182778
CCNH	0.00138365	0.004	0.124412
CCNK	2.67e-05	0.829	1
CCNO	6.8e-05	0.107	0.761665
CCNT2	5.56e-05	0.155	0.805056
CCNY	2e-07	0.998	1
CCR1	2.9e-05	0.696	1
CCR10	3.14e-05	0.45	0.989969
CCR6	7.79e-08	0.973	1
CCS	1.62e-06	0.827	1
CCT2	3.4e-06	0.999	1
CCT3	2.03e-06	0.989	1
CCT4	5.82e-06	0.983	1
CCT5	1.05e-05	0.999	1
CCT6A	2.36e-06	0.99	1
CCT7	2.71e-06	0.991	1
CCT8	2.21e-06	0.996	1
CD14	0.00132122	0.009	0.219635
CD151	1.82e-05	0.483	1
CD180	0	0.18	0.805056
CD1A	1.82e-06	0.743	1
CD1B	1.64e-06	0.762	1
CD1D	1.55e-05	0.751	1
CD2	1.26e-05	0.867	1
CD200	0	0.173	0.805056
CD209	5.56e-06	0.645	1
CD226	8.46e-06	0.271	0.868962
CD244	1.8e-06	0.854	1
CD247	0.000133625	0.547	1
CD27	7.54e-06	0.316	0.913033
CD274	1.14e-07	0.638	1
CD28	0.000402341	0.237	0.849105
CD2AP	7.98e-05	0.472	0.998946
CD2BP2	2.91e-05	0.919	1
CD300LF	1.93e-07	0.813	1
CD33	5.09e-07	0.764	1
CD34	3.59e-06	0.358	0.940973
CD36	3.9e-05	0.584	1
CD38	3e-06	0.785	1
CD3D	4.1e-05	0.755	1
CD3E	0.000130228	0.266	0.868777
CD3EAP	0.00121407	0.018	0.337899
CD3G	7.61e-05	0.447	0.989969
CD4	0.000364242	0.215	0.822288
CD40	0.000162854	0.096	0.761665
CD44	0.00129615	0.036	0.519136
CD46	1.2e-05	0.374	0.950733
CD47	7.01e-05	0.535	1
CD48	9.51e-06	0.665	1
CD5	2.6e-05	0.622	1
CD53	6.92e-05	0.175	0.805056
CD55	1.42e-05	0.433	0.977717
CD58	6.92e-07	0.732	1
CD59	4.18e-06	0.947	1
CD63	4.28e-05	0.431	0.977026
CD7	1.03e-05	0.605	1
CD72	5.71e-06	0.873	1
CD74	7.69e-05	0.405	0.963526
CD79A	2.2e-05	0.735	1
CD79B	2.79e-05	0.639	1
CD81	0.000101132	0.362	0.942121
CD84	1.12e-07	0.526	1
CD86	6.68e-06	0.435	0.979445
CD8B	5.92e-05	0.49	1
CD9	4.34e-05	0.65	1
CD93	4.83e-05	0.447	0.989969
CD96	7.53e-08	0.551	1
CDC14A	1.96e-07	0.666	1
CDC14B	1.84e-07	0.87	1
CDC16	7.92e-05	0.358	0.940973
CDC20	0.00136911	0.002	0.0733526
CDC23	0.000135438	0.101	0.761665
CDC25A	0.00135548	0.001	0.0409355
CDC25B	0.00120923	0.025	0.402602
CDC25C	0.000165798	0.111	0.761665
CDC26	7.4e-05	0.223	0.831825
CDC27	0.000120714	0.263	0.868367
CDC34	4.68e-05	0.341	0.931401
CDC37	0.000137539	0.367	0.946591
CDC40	3.11e-05	0.978	1
CDC42EP1	3.26e-06	0.988	1
CDC42EP2	7.89e-08	0.993	1
CDC42EP3	1.45e-07	1	1
CDC42EP4	1.61e-08	1	1
CDC42EP5	3.39e-08	0.992	1
CDC42SE1	1.65e-06	0.761	1
CDC5L	2.72e-05	0.335	0.926519
CDC6	0.000362563	0.208	0.81266
CDC7	0.00133556	0.011	0.240672
CDC73	2.63e-06	0.905	1
CDCA5	7.17e-06	0.398	0.961145
CDCA7	7.32e-06	0.101	0.761665
CDCA8	4.34e-05	0.82	1
CDCP1	3.15e-06	0.457	0.991474
CDH1	0.00147164	0.057	0.699545
CDH11	3.18e-06	0.422	0.96979
CDH12	0.00118366	0.051	0.652409
CDH15	3.49e-05	0.366	0.945165
CDH16	5.12e-06	0.175	0.805056
CDH2	9.97e-05	0.486	1
CDH24	3.35e-06	0.39	0.956163
CDH3	8.57e-07	0.18	0.805056
CDH5	0.00121109	0.039	0.552355
CDH6	4.79e-05	0.298	0.891892
CDH7	0.00036726	0.147	0.799927
CDH8	5.38e-06	0.183	0.805056
CDH9	2.3e-05	0.284	0.880392
CDK2	0.0025686	0	0
CDK2AP1	3.23e-05	0.171	0.805056
CDK2AP2	0.000118689	0.173	0.805056
CDK3	0.000142701	0.166	0.805056
CDK4	0.00168	0	0
CDK5	2.72e-05	0.305	0.89973
CDK5R1	4.09e-05	0.632	1
CDK5R2	4.17e-06	0.846	1
CDK5RAP2	4.4e-05	0.447	0.989969
CDK6	0.00136047	0	0
CDK7	0.00190188	0	0
CDK8	0.000106761	0.261	0.868367
CDK9	8.64e-05	0.548	1
CDKN1A	0.00164405	0.018	0.337899
CDKN1B	0.00148663	0.019	0.346422
CDKN1C	0.00124448	0.022	0.37727
CDKN2A	0.00140668	0.046	0.615759
CDKN2B	0.00117625	0.056	0.689942
CDKN2C	0.00123868	0.007	0.182778
CDKN2D	0.00118292	0.012	0.255503
CDKN3	2.35e-05	0.245	0.855545
CDSN	1.24e-06	0.997	1
CDX2	0.00117603	0.018	0.337899
CDYL	4.13e-05	0.104	0.761665
CEACAM1	2.16e-05	0.51	1
CEACAM3	4.26e-07	0.851	1
CEBPA	0.000192277	0.194	0.805056
CEBPB	0.000311891	0.185	0.805056
CEBPD	3.96e-05	0.482	1
CEBPE	1.84e-05	0.364	0.944227
CEBPG	9.08e-06	0.678	1
CEBPZ	3.77e-05	0.194	0.805056
CEL	0.000128197	0.228	0.841081
CELSR1	8.85e-07	0.556	1
CELSR2	1.52e-06	0.804	1
CELSR3	9.96e-07	0.998	1
CEND1	3.61e-07	0.997	1
CENPA	0.000116393	0.169	0.805056
CENPB	9.9e-05	0.13	0.776092
CENPC1	4.37e-05	0.586	1
CENPE	5.05e-05	0.512	1
CENPF	4.99e-05	0.805	1
CENPH	5.36e-05	0.527	1
CENPJ	4.71e-05	0.762	1
CENPK	5.99e-05	0.471	0.998946
CENPL	3.55e-05	0.78	1
CENPM	6.06e-05	0.315	0.912637
CENPN	4.96e-05	0.448	0.989969
CENPO	5.86e-05	0.58	1
CENPQ	5.88e-05	0.45	0.989969
CENPT	3.25e-05	0.876	1
CEP170	6.23e-07	0.998	1
CEP250	4.79e-05	0.604	1
CEP290	3.76e-05	0.778	1
CEP55	9.37e-06	0.37	0.94778
CEP57	6.13e-05	0.555	1
CEP63	4.29e-05	0.811	1
CEP70	5.62e-05	0.817	1
CEP72	3.95e-05	0.89	1
CEP76	2.82e-05	0.96	1
CER1	2.9e-06	0.772	1
CETN1	5.48e-07	0.977	1
CETN3	1.09e-06	0.67	1
CETP	3.36e-06	0.832	1
CFB	1.07e-05	0.404	0.963526
CFD	9.08e-06	0.45	0.989969
CFDP1	4.64e-06	0.097	0.761665
CFL1	0.00118669	0.091	0.761665
CFL2	4.85e-06	0.674	1
CFLAR	0.00127329	0	0
CFTR	2.81e-05	0.812	1
CGA	0.000136079	0.186	0.805056
CGGBP1	7.37e-07	0.289	0.883713
CGN	3.47e-05	0.252	0.864759
CHAD	1.26e-05	0.345	0.933246
CHAF1A	8.08e-05	0.328	0.922091
CHAF1B	3.82e-06	0.246	0.85715
CHAT	6.31e-06	0.796	1
CHD4	6.75e-06	0.772	1
CHD6	3.8e-05	0.125	0.775293
CHD8	3.49e-06	0.177	0.805056
CHEK1	0.00158754	0	0
CHEK2	0.00180376	0	0
CHFR	1.27e-05	0.47	0.998946
CHGB	0.000170228	0.26	0.868367
CHIC2	2.13e-06	1	1
CHID1	0	0.198	0.808795
CHL1	0.00121041	0.014	0.282898
CHML	1.05e-06	0.982	1
CHMP2A	7.01e-06	0.528	1
CHMP2B	1.44e-06	0.905	1
CHMP4A	0.000283277	0.119	0.76754
CHMP4B	0.000107776	0.136	0.783049
CHMP4C	0.00130752	0.015	0.298354
CHMP5	1.22e-05	0.862	1
CHMP6	2e-05	0.791	1
CHN1	2.04e-05	0.336	0.926519
CHN2	1.13e-06	0.909	1
CHORDC1	7.35e-07	0.843	1
CHP	6.27e-06	0.978	1
CHP2	6.33e-07	0.948	1
CHPF	4.88e-06	0.967	1
CHRAC1	5.18e-07	0.929	1
CHRD	4.77e-06	0.752	1
CHRM1	2.13e-06	0.399	0.961145
CHRM2	6.43e-06	0.559	1
CHRM4	0	0.172	0.805056
CHRNA1	1.95e-06	0.537	1
CHRNA4	1.73e-06	0.853	1
CHRNA5	5.79e-08	0.946	1
CHRNB1	2.17e-06	0.612	1
CHRNB2	3.01e-07	0.99	1
CHRNB4	5.45e-07	0.946	1
CHRNE	7.52e-06	0.317	0.914673
CHST1	1.03e-06	0.44	0.984068
CHTF18	4.74e-05	0.279	0.87571
CHUK	0.000286815	0.259	0.868122
CIAO1	2.6e-07	0.973	1
CIB2	1.63e-06	0.187	0.805056
CIC	1.49e-06	1	1
CIDEA	7.98e-07	0.909	1
CIDEB	6.29e-07	0.729	1
CIITA	6.1e-06	0.875	1
CIRBP	1.43e-06	0.886	1
CISH	4.28e-05	0.122	0.770239
CIT	0.00117533	0.046	0.615759
CITED2	2.23e-05	0.37	0.94778
CITED4	6.66e-06	0.438	0.981324
CKAP2	8.22e-07	0.998	1
CKAP4	3.04e-05	0.109	0.761665
CKAP5	0.000192017	0.271	0.868962
CKB	4.86e-07	0.807	1
CKM	9.06e-06	0.808	1
CKMT2	1.96e-06	0.79	1
CKS1B	4.12e-05	0.094	0.761665
CLASP2	4.21e-05	0.676	1
CLCA1	1.76e-06	0.629	1
CLCA2	1.63e-06	0.468	0.996463
CLCN3	9.53e-07	0.913	1
CLDN1	5.1e-05	0.259	0.868122
CLDN11	1.82e-06	0.339	0.929138
CLDN12	8.25e-08	0.89	1
CLDN4	2.68e-05	0.207	0.81266
CLDN5	6.91e-07	0.556	1
CLEC11A	2.72e-06	0.27	0.868962
CLEC2D	8.81e-08	0.82	1
CLEC3B	4.08e-05	0.084	0.761665
CLEC4A	1.26e-06	0.814	1
CLEC4M	3.62e-06	0.561	1
CLEC5A	5.08e-06	0.119	0.76754
CLIC3	1.4e-06	0.609	1
CLIC4	1.81e-06	0.996	1
CLIC5	2.55e-06	0.996	1
CLIC6	1.57e-05	0.33	0.924845
CLIP1	5.04e-05	0.403	0.963465
CLIP2	2.86e-06	0.46	0.992418
CLK1	7.15e-06	0.941	1
CLK2	0.00117617	0.02	0.354469
CLK3	0.000146914	0.252	0.864759
CLK4	4.11e-09	0.941	1
CLNS1A	1.61e-05	0.606	1
CLOCK	1.73e-05	0.421	0.968193
CLPB	8.15e-07	0.917	1
CLPP	0	0.193	0.805056
CLPS	0	0.328	0.922091
CLSPN	0.000205853	0.089	0.761665
CLSTN1	1.01e-05	0.852	1
CLTA	2.17e-05	0.748	1
CLTB	1.3e-05	0.845	1
CLTC	4.97e-05	0.866	1
CLTCL1	1.21e-06	0.478	1
CLU	0.000195131	0.147	0.799927
CMAS	2.21e-07	0.765	1
CMKLR1	3.85e-07	0.819	1
CMTM3	2.45e-06	0.242	0.853999
CMTM8	6.05e-06	0.149	0.805056
CNDP2	6.58e-06	0.183	0.805056
CNGB3	2.63e-07	0.808	1
CNKSR3	1.78e-07	0.626	1
CNN1	6.4e-06	0.945	1
CNN3	5.75e-06	0.217	0.82447
CNNM3	2.43e-06	0.918	1
CNO	3.21e-06	0.863	1
CNOT1	1.74e-05	0.712	1
CNOT10	2.18e-06	0.947	1
CNOT2	6.12e-07	0.996	1
CNOT3	2.24e-06	0.958	1
CNOT4	6.49e-05	0.35	0.935668
CNOT6	1.54e-06	0.568	1
CNOT7	6.13e-05	0.274	0.868962
CNP	1.52e-06	0.991	1
CNR1	6.69e-06	0.66	1
CNTFR	1.35e-05	0.67	1
CNTN1	1.66e-05	0.771	1
CNTN2	1.3e-05	0.665	1
CNTN6	0.00016686	0.123	0.77042
CNTNAP1	6.96e-06	0.512	1
CNTNAP2	0.000134448	0.293	0.8857
COASY	3.31e-06	0.575	1
COG1	7.27e-10	0.852	1
COG4	9.5e-09	0.852	1
COG5	5.59e-08	0.852	1
COG8	1.21e-05	0.204	0.810507
COIL	2.84e-05	0.975	1
COL10A1	9.09e-06	0.316	0.913033
COL11A1	1.02e-05	0.189	0.805056
COL11A2	6.19e-06	0.514	1
COL13A1	7.83e-05	0.183	0.805056
COL17A1	1.4e-05	0.629	1
COL18A1	0.00120512	0.008	0.205506
COL1A1	0.000411137	0.145	0.797249
COL1A2	0.000241292	0.267	0.868777
COL23A1	5.03e-06	0.377	0.951876
COL2A1	0.000217184	0.456	0.991474
COL3A1	0.000343867	0.095	0.761665
COL4A1	4.66e-05	0.667	1
COL4A2	3.84e-05	0.608	1
COL4A3	6.87e-05	0.489	1
COL4A3BP	4.33e-06	0.57	1
COL4A4	2.23e-05	0.409	0.96652
COL5A1	8.74e-06	0.29	0.884639
COL5A2	1.03e-05	0.29	0.884639
COL6A1	6.33e-05	0.26	0.868367
COL6A2	9.25e-06	0.53	1
COL6A3	3.5e-05	0.143	0.794514
COL7A1	3.78e-05	0.352	0.935668
COL8A1	2.4e-06	0.999	1
COL9A2	4.11e-06	0.925	1
COMMD1	3.29e-05	0.5	1
COMMD3	2.35e-07	0.991	1
COMMD8	1.07e-06	0.622	1
COMT	0.00120441	0.042	0.578069
COPA	7.63e-06	0.873	1
COPB1	2.43e-05	0.783	1
COPB2	1.8e-05	0.629	1
COPE	1.83e-06	0.818	1
COPS3	7.09e-06	0.591	1
COPS6	0.000354983	0.443	0.985912
COPS7B	6.95e-07	0.926	1
COQ6	1.77e-07	0.874	1
CORO1A	1.43e-05	0.108	0.761665
CORO1B	1.32e-06	0.551	1
CORO2B	9.68e-07	0.999	1
COX17	3.32e-06	0.94	1
COX4I1	2.1e-06	0.716	1
COX4I2	1.05e-06	0.646	1
COX5A	1.94e-05	0.617	1
COX5B	1.8e-06	0.684	1
COX6A1	2.64e-06	0.761	1
COX6B1	4.17e-06	0.766	1
COX7A2L	3.11e-06	0.759	1
COX8A	3.11e-06	0.745	1
CPE	1.69e-05	0.547	1
CPLX2	1.92e-07	1	1
CPNE1	9.18e-06	0.798	1
CPNE2	1.02e-05	0.844	1
CPNE3	2.97e-07	0.812	1
CPNE4	8.69e-06	0.954	1
CPSF2	2.4e-05	0.995	1
CPSF3	3.28e-05	0.971	1
CPSF3L	2.13e-05	0.292	0.885631
CPSF4	1.27e-06	0.65	1
CPSF6	3e-05	0.776	1
CPXM2	2.09e-07	0.993	1
CR1	2.59e-05	0.51	1
CR2	3.35e-05	0.38	0.953004
CRADD	5.87e-05	0.414	0.968155
CRB2	1.14e-05	0.169	0.805056
CRB3	8.88e-07	0.964	1
CRCT1	8.01e-06	0.761	1
CREB1	0.00029947	0.175	0.805056
CREB3	3.57e-06	0.948	1
CREB3L3	1.66e-06	0.932	1
CREB5	5.95e-06	0.163	0.805056
CREG1	0.000135011	0.095	0.761665
CRELD1	1.19e-05	0.845	1
CREM	1.43e-05	0.108	0.761665
CRH	1.58e-07	0.827	1
CRHBP	1.43e-06	0.562	1
CRHR1	6.26e-06	0.909	1
CRHR2	1.39e-06	0.63	1
CRIP1	3.07e-07	0.971	1
CRIP2	2.92e-06	0.83	1
CRIPT	2.46e-06	1	1
CRK	0.000295193	0.238	0.849331
CRKL	9.4e-05	0.487	1
CRLS1	2.48e-05	0.124	0.77211
CRMP1	0.000103176	0.786	1
CRP	1.38e-05	0.602	1
CRTC1	6.04e-05	0.091	0.761665
CRY1	5.34e-05	0.268	0.868962
CRY2	1.97e-05	0.361	0.942121
CRYAB	8.11e-06	0.639	1
CRYBA1	5.26e-08	0.947	1
CRYBA2	1.69e-06	0.7	1
CRYBB2	1.31e-06	0.889	1
CRYGC	7.63e-07	0.913	1
CS	4.37e-06	0.471	0.998946
CSDA	2.88e-05	0.128	0.776092
CSDE1	8.6e-06	0.431	0.977026
CSE1L	0.000181672	0.127	0.776092
CSF1	0.00118571	0.004	0.124412
CSF1R	5.36e-05	0.146	0.798595
CSF2	0.00122488	0.012	0.255503
CSF2RB	6.92e-05	0.187	0.805056
CSF3	0.00116756	0.002	0.0733526
CSF3R	0.00153031	0.002	0.0733526
CSN1S1	3.3e-06	0.286	0.88048
CSNK1A1	5.62e-05	0.217	0.82447
CSNK1D	6.63e-05	0.791	1
CSNK1E	0.000143413	0.21	0.814456
CSNK1G1	7.57e-06	0.686	1
CSNK1G3	2.39e-07	0.855	1
CSNK2A1	0.00191566	0.018	0.337899
CSNK2A2	0.000305811	0.28	0.87571
CSNK2B	0.00067722	0.114	0.761665
CSPG4	1.15e-05	0.529	1
CSPG5	6e-07	0.847	1
CSRP2	4.57e-06	0.465	0.995336
CST3	2.08e-05	0.435	0.979445
CST5	5.46e-07	0.49	1
CST7	6.06e-06	0.528	1
CSTB	1.82e-05	0.423	0.96998
CSTF1	5.46e-05	0.347	0.933246
CSTF2T	1.45e-06	0.998	1
CSTF3	2.44e-05	0.856	1
CTBP1	0.00024666	0.285	0.880392
CTBP2	5.6e-05	0.541	1
CTCF	6.99e-06	0.815	1
CTDP1	7.39e-05	0.273	0.868962
CTDSP1	5.51e-05	0.079	0.761665
CTDSP2	1.06e-05	0.088	0.761665
CTDSPL	3.63e-06	0.36	0.942121
CTGF	0.00128053	0.002	0.0733526
CTHRC1	1.12e-07	0.638	1
CTLA4	1.49e-05	0.61	1
CTNNA2	1.3e-07	0.183	0.805056
CTNNA3	1.27e-06	0.18	0.805056
CTNNB1	0.00213746	0.101	0.761665
CTNNBIP1	2.38e-05	0.183	0.805056
CTNNBL1	5.52e-06	0.244	0.854404
CTNND2	2.53e-05	0.572	1
CTPS	1.13e-07	0.998	1
CTR9	7.47e-06	0.724	1
CTRL	1.31e-06	0.451	0.989969
CTSA	5.26e-07	0.402	0.963252
CTSB	7.07e-05	0.517	1
CTSC	2.43e-06	0.636	1
CTSD	0.00130162	0.022	0.37727
CTSE	1.01e-05	0.388	0.956062
CTSG	0.000125388	0.208	0.81266
CTSH	3.72e-06	0.564	1
CTSK	0.00124556	0.01	0.229891
CTSL1	0.000103394	0.474	1
CTSS	9.88e-06	0.49	1
CTTN	1.09e-05	0.979	1
CUBN	1.9e-05	0.624	1
CUEDC1	2.23e-06	0.696	1
CUL1	0.00132179	0.06	0.722391
CUL2	4.62e-05	0.525	1
CUL3	2.67e-05	0.564	1
CUL4A	4.95e-05	0.287	0.880994
CUL5	4.02e-05	0.518	1
CUL7	2.01e-06	0.638	1
CWF19L1	9.75e-06	0.227	0.841081
CX3CL1	1.04e-05	0.171	0.805056
CXADR	1.14e-06	0.837	1
CXCL1	0.00119253	0	0
CXCL11	5.73e-05	0.096	0.761665
CXCL12	8.03e-05	0.312	0.908092
CXCL13	4.69e-05	0.342	0.932928
CXCL16	0.000382068	0.111	0.761665
CXCL5	1.13e-05	0.096	0.761665
CXCR4	9.93e-05	0.372	0.947928
CXXC1	9.87e-07	0.967	1
CXXC4	2.65e-07	0.735	1
CYB561D2	7.13e-07	0.673	1
CYB5A	0.00058011	0.1	0.761665
CYB5R1	1.85e-06	0.987	1
CYB5R2	7.29e-06	0.328	0.922091
CYB5R3	2.09e-05	0.222	0.829558
CYBA	3.92e-06	0.814	1
CYC1	0.0011792	0.073	0.761665
CYCS	0.000240411	0.649	1
CYFIP1	1.73e-06	0.994	1
CYFIP2	1.03e-05	0.927	1
CYP11A1	8.36e-07	0.994	1
CYP17A1	0.00126227	0.004	0.124412
CYP1A2	0.00118229	0.013	0.269559
CYP2C19	0.00120114	0.005	0.145528
CYP2E1	0.00124852	0.006	0.166245
CYR61	0.00120687	0	0
CYSLTR2	1.35e-06	0.495	1
DAAM1	3.68e-06	0.976	1
DAB1	0.000108464	0.378	0.952128
DAB2	0.00118722	0.029	0.453214
DAB2IP	4.3e-06	0.299	0.892779
DACH1	5.58e-06	0.708	1
DAD1	1.4e-06	0.821	1
DAG1	6.66e-06	0.795	1
DAK	0	0.181	0.805056
DAP	3.94e-07	0.623	1
DAP3	9.88e-05	0.081	0.761665
DAPK1	3.02e-06	0.353	0.936365
DAPK2	6.19e-08	0.419	0.968155
DAPK3	1.08e-05	0.32	0.917488
DAPP1	1.81e-05	0.628	1
DARS	7.29e-06	0.826	1
DAZAP1	1.55e-06	0.998	1
DBC1	0	0.21	0.814456
DBF4	0.000104116	0.103	0.761665
DBI	0	0.243	0.854404
DBN1	1.31e-06	0.885	1
DBT	3.76e-06	0.537	1
DCC	7.53e-05	0.688	1
DCK	4.69e-07	0.97	1
DCLRE1A	0.00116032	0.032	0.48
DCLRE1B	0.0011987	0.025	0.402602
DCLRE1C	0.00164016	0	0
DCN	0.00116682	0.005	0.145528
DCP1A	4.36e-05	0.879	1
DCTD	5.27e-07	0.923	1
DCTN1	1.22e-05	0.996	1
DCTN2	3.56e-05	0.948	1
DCTN3	4.73e-05	0.801	1
DCUN1D1	6.04e-06	0.68	1
DDAH2	1.49e-06	0.221	0.827283
DDB1	0.00134658	0.024	0.399685
DDB2	0.00133046	0.003	0.102339
DDIT3	5.02e-05	0.431	0.977026
DDIT4	1.23e-05	0.207	0.81266
DDOST	8.4e-06	0.995	1
DDR2	0.00118543	0.013	0.269559
DDX1	8.59e-06	0.221	0.827283
DDX11	1.23e-05	0.243	0.854404
DDX17	1.68e-05	0.698	1
DDX18	3.95e-06	0.839	1
DDX19A	4.99e-07	1	1
DDX19B	1.03e-06	0.939	1
DDX20	0.00119232	0.101	0.761665
DDX21	2.99e-06	0.345	0.933246
DDX23	2.88e-05	0.92	1
DDX24	0.000105295	0.596	1
DDX27	6.77e-06	0.45	0.989969
DDX42	2.4e-05	0.185	0.805056
DDX49	3.02e-07	0.971	1
DDX5	1.92e-05	0.275	0.868962
DDX50	1.81e-06	0.366	0.945165
DDX56	1.2e-06	0.571	1
DDX6	5.13e-06	0.831	1
DEDD	5.03e-05	0.117	0.764537
DEDD2	2.87e-05	0.195	0.806498
DEF6	6.01e-06	0.861	1
DEFB1	4.48e-07	0.973	1
DEGS1	6.49e-06	0.139	0.790991
DERL1	8.04e-06	0.413	0.968155
DERL2	1.54e-06	0.383	0.955993
DES	4.72e-05	0.61	1
DEXI	1.58e-06	0.808	1
DFFA	5.33e-06	0.527	1
DFFB	5.64e-06	0.551	1
DFNA5	1.79e-06	0.791	1
DGCR2	1.14e-06	0.696	1
DGCR6L	3.02e-07	1	1
DGCR8	4.89e-06	0.182	0.805056
DGKA	9.8e-07	0.66	1
DGKD	1.54e-06	0.814	1
DGKQ	1.97e-06	0.834	1
DGKZ	2.65e-05	0.369	0.94778
DHDDS	9.67e-05	0.231	0.843576
DHFR	0.00123946	0.006	0.166245
DHH	3.65e-05	0.19	0.805056
DHPS	3.58e-07	0.982	1
DHRS1	1.03e-06	0.999	1
DHRS7B	4.27e-07	0.543	1
DHX29	4.66e-06	0.42	0.968193
DHX30	4.55e-05	0.523	1
DHX34	9.23e-08	0.42	0.968193
DHX38	3.54e-05	0.943	1
DHX9	6.84e-05	0.703	1
DIABLO	1.55e-05	0.66	1
DICER1	0.00127251	0.018	0.337899
DIDO1	1.24e-06	0.959	1
DIO2	2.24e-07	0.582	1
DIS3	4.95e-05	0.474	1
DKK1	0.00122939	0.047	0.623881
DKK2	3.39e-05	0.247	0.857808
DKK3	7.35e-07	0.997	1
DKK4	6.27e-07	0.501	1
DLAT	0.000162934	0.203	0.809067
DLC1	4.34e-07	0.834	1
DLD	6.07e-05	0.537	1
DLG1	8.33e-05	0.97	1
DLG4	0.000274673	0.888	1
DLGAP1	2.41e-05	0.38	0.953004
DLGAP4	5.49e-06	0.989	1
DLK1	3.03e-06	0.819	1
DLK2	4.4e-07	0.987	1
DLL1	6.06e-05	0.626	1
DLL3	2.41e-06	0.788	1
DLST	1.39e-05	0.937	1
DLX1	1.85e-06	0.746	1
DLX2	1.19e-06	0.691	1
DLX3	5.18e-07	0.846	1
DLX5	5.61e-06	0.745	1
DMAP1	8.77e-05	0.304	0.899664
DMBX1	8.53e-08	0.998	1
DMC1	0.00138284	0	0
DMP1	3.08e-05	0.115	0.761665
DMPK	7.5e-06	0.984	1
DMRTB1	2.58e-06	0.872	1
DMTF1	3.77e-05	0.104	0.761665
DMWD	2.71e-06	0.324	0.921414
DMXL2	2.91e-08	1	1
DNAI1	1.75e-07	0.861	1
DNAJA3	4.02e-05	0.372	0.947928
DNAJB1	0.000151073	0.142	0.793125
DNAJB11	1.44e-05	0.348	0.933246
DNAJB2	8.17e-07	0.962	1
DNAJB6	4.95e-07	0.849	1
DNAJC1	4.06e-07	0.847	1
DNAJC14	2.66e-06	0.438	0.981324
DNAJC5	2.72e-06	0.998	1
DNAJC6	3.94e-06	0.821	1
DNAJC7	3.15e-05	0.182	0.805056
DNAL4	2.6e-06	0.75	1
DNALI1	2.11e-06	0.494	1
DNM1	0.000174945	0.529	1
DNM2	0.000124763	0.115	0.761665
DNM3	4.35e-06	0.592	1
DNMBP	3.3e-06	0.93	1
DNMT1	0.00129305	0.005	0.145528
DNMT3A	0.00119395	0.04	0.560265
DNMT3B	0.00122202	0.02	0.354469
DNTT	7.96e-05	0.37	0.94778
DNTTIP2	3.73e-05	0.268	0.868962
DOC2A	2.11e-07	1	1
DOCK1	2.38e-05	0.381	0.953627
DOCK2	4.74e-05	0.16	0.805056
DOCK3	2.46e-06	0.572	1
DOCK4	0.00117786	0.011	0.240672
DOCK6	1.17e-06	0.759	1
DOCK7	3.02e-05	0.12	0.76754
DOCK8	3.26e-06	0.796	1
DOHH	3.54e-08	0.618	1
DOK1	0.000158141	0.268	0.868962
DOK2	6.16e-05	0.207	0.81266
DOK3	1.63e-06	0.242	0.853999
DOK4	1.67e-05	0.324	0.921414
DOK5	2.67e-05	0.092	0.761665
DOM3Z	4.45e-06	0.941	1
DPH3	2.81e-09	0.999	1
DPM1	5.54e-07	0.986	1
DPM2	2.2e-07	0.993	1
DPP3	2.11e-06	0.629	1
DPP4	0.00130629	0.023	0.386071
DPP6	6.65e-07	0.338	0.928403
DPP7	4.14e-08	0.849	1
DPPA2	3.87e-06	1	1
DPT	6.49e-05	0.106	0.761665
DPYS	1.57e-07	0.689	1
DPYSL2	2.55e-05	0.474	1
DPYSL3	1.89e-07	0.693	1
DPYSL4	2.82e-07	0.943	1
DPYSL5	4.06e-06	0.691	1
DR1	2.18e-06	0.792	1
DRAP1	4.57e-05	0.489	1
DRD1	2.04e-05	0.312	0.908092
DRD2	0.00119093	0.09	0.761665
DRD3	9.01e-06	0.854	1
DRD4	3e-06	0.788	1
DRD5	1.78e-06	0.941	1
DRG1	2e-06	0.708	1
DSC1	6.24e-06	0.59	1
DSC2	1.09e-05	0.548	1
DSC3	0.00116932	0.051	0.652409
DSCAML1	4.04e-06	0.265	0.868777
DSG1	8.83e-07	0.745	1
DSG2	1.53e-05	0.477	1
DSG3	1.17e-05	0.396	0.959606
DSN1	5.72e-05	0.463	0.994494
DSP	1.54e-05	0.862	1
DTL	1.56e-05	0.281	0.87571
DTNA	1.54e-05	0.755	1
DTNB	9.09e-06	0.996	1
DTNBP1	1.87e-06	1	1
DTX1	5.41e-06	0.718	1
DTX3L	1.94e-06	0.751	1
DUS2L	1.55e-07	0.918	1
DUSP1	2.14e-05	0.162	0.805056
DUSP10	6.86e-06	0.63	1
DUSP11	4.27e-07	0.812	1
DUSP12	2.27e-06	0.793	1
DUSP16	1e-05	0.494	1
DUSP19	2.51e-06	0.327	0.92173
DUSP2	7.21e-06	0.15	0.805056
DUSP22	1.86e-05	0.139	0.790991
DUSP26	3.77e-07	0.362	0.942121
DUSP3	2.85e-05	0.174	0.805056
DUSP4	5.54e-06	0.863	1
DUSP5	0.00117146	0.012	0.255503
DUSP6	6.81e-06	0.694	1
DUSP7	7.21e-06	0.161	0.805056
DUT	0.0012042	0.023	0.386071
DVL1	4.27e-05	0.735	1
DVL2	5.85e-05	0.951	1
DVL3	5.69e-05	0.645	1
DYDC2	1.85e-06	0.927	1
DYNC1H1	3.1e-05	0.887	1
DYNC1LI1	1.85e-06	0.322	0.921141
DYNC2LI1	2.1e-07	0.997	1
DYNLL1	0.000713712	0.272	0.868962
DYNLRB1	2.21e-05	0.237	0.849105
DYNLT1	7.3e-06	0.934	1
DYRK1A	8.15e-06	0.897	1
DYRK1B	4.57e-06	0.629	1
DYRK2	1.52e-05	0.278	0.874522
DZIP3	4.79e-06	0.804	1
E2F1	0.00183993	0.004	0.124412
E2F2	0.00120363	0.019	0.346422
E2F3	0.00155844	0.003	0.102339
E2F4	0.00140637	0	0
E2F5	0.00124057	0	0
E2F6	0.00123441	0.044	0.596538
E2F7	9.01e-05	0.111	0.761665
E4F1	3.3e-05	0.281	0.87571
EAF1	2.11e-06	0.591	1
EAF2	3.51e-06	0.59	1
EAPP	1.37e-06	0.999	1
EBAG9	9.05e-06	0.107	0.761665
EBF1	1.11e-05	0.326	0.92173
EBI3	5.21e-05	0.257	0.867375
ECE1	3.82e-06	0.608	1
ECH1	5.34e-06	0.579	1
ECM1	1.03e-05	0.245	0.855545
ECSIT	4.41e-06	0.98	1
EDAR	1.28e-05	0.401	0.962673
EDC3	1.28e-05	0.859	1
EDC4	9.9e-06	0.807	1
EDIL3	1.07e-05	0.196	0.806498
EDN1	6.16e-05	0.495	1
EDN2	5.51e-06	0.467	0.995336
EDN3	2.22e-06	0.552	1
EDNRB	4.33e-05	0.391	0.956397
EEA1	1.21e-05	0.703	1
EED	0.000102265	0.345	0.933246
EEF1A1	0.000486618	0.533	1
EEF1B2	1.19e-05	0.801	1
EEF1D	1.62e-05	0.92	1
EEF1E1	1.87e-05	0.52	1
EEF1G	0.000399825	0.291	0.885137
EEF2	5.13e-05	0.861	1
EEF2K	1.58e-05	0.828	1
EFCAB4B	8.33e-07	0.622	1
EFCAB6	1.87e-06	0.219	0.827116
EFEMP1	0.00117977	0.053	0.665911
EFEMP2	1.38e-05	1	1
EFHA1	5.04e-07	0.418	0.968155
EFNA1	0.00123487	0.059	0.718532
EFNA2	5.21e-05	0.23	0.843068
EFNA3	8.78e-06	0.615	1
EFNA4	1.13e-05	0.492	1
EFNA5	7.08e-05	0.461	0.993224
EFNB2	0.0012185	0.055	0.685609
EFNB3	5.2e-06	0.269	0.868962
EFS	5.41e-06	0.534	1
EFTUD2	3.46e-05	0.898	1
EGF	0.00131099	0.036	0.519136
EGFR	0.00167898	0.051	0.652409
EGLN1	1.92e-05	0.261	0.868367
EGLN2	1.01e-05	0.262	0.868367
EGLN3	2.18e-05	0.221	0.827283
EGR1	0.00150551	0.011	0.240672
EGR2	0.001203	0.028	0.440844
EGR3	2.23e-05	0.085	0.761665
EHBP1	3.51e-07	0.792	1
EHD1	2.61e-06	0.684	1
EHD2	2.14e-06	0.868	1
EHD3	3.96e-07	0.817	1
EHD4	3.6e-06	0.431	0.977026
EHHADH	3.19e-08	0.429	0.975629
EHMT2	4.82e-05	0.672	1
EID2	4.2e-06	0.653	1
EIF2A	6.68e-06	0.091	0.761665
EIF2AK1	4.98e-06	0.38	0.953004
EIF2AK2	0.00149005	0.001	0.0409355
EIF2B1	6.09e-06	0.947	1
EIF2B2	3.32e-06	0.85	1
EIF2B3	1.52e-06	0.828	1
EIF2B4	1.56e-06	0.874	1
EIF2B5	1.25e-05	0.723	1
EIF2C1	1.67e-05	0.194	0.805056
EIF2C2	0.000207473	0.176	0.805056
EIF2S1	0.000211754	0.225	0.837808
EIF2S2	4.5e-05	0.903	1
EIF3A	6.93e-06	0.998	1
EIF3B	8.39e-06	0.99	1
EIF3D	4.36e-06	1	1
EIF3E	3.37e-05	0.941	1
EIF3F	1.57e-05	0.979	1
EIF3G	5.59e-06	0.999	1
EIF3H	4.65e-05	0.876	1
EIF3I	2.45e-05	0.816	1
EIF3J	1.04e-05	1	1
EIF3K	6.41e-06	0.987	1
EIF3M	2.45e-05	0.879	1
EIF4A1	1.76e-05	0.938	1
EIF4A2	5.43e-06	0.996	1
EIF4A3	1.42e-05	0.989	1
EIF4B	1.36e-05	0.99	1
EIF4E2	1.1e-06	0.987	1
EIF4EBP1	2.94e-05	0.494	1
EIF4ENIF1	5.37e-07	1	1
EIF4G1	3.33e-05	1	1
EIF4G2	2.87e-06	0.995	1
EIF4G3	1.72e-06	0.84	1
EIF4H	5.15e-06	0.998	1
EIF5	1.9e-05	0.868	1
EIF5A	5.03e-06	0.618	1
EIF5B	4.45e-06	0.997	1
ELAC2	4.25e-06	0.769	1
ELAVL1	7.95e-06	0.944	1
ELAVL2	0	0.202	0.809067
ELF5	6.13e-07	0.997	1
ELK3	2.79e-05	0.325	0.921414
ELK4	1.04e-05	0.533	1
ELL	7.37e-05	0.367	0.946591
ELL3	4.13e-06	0.212	0.817217
ELMO1	0.00117819	0.086	0.761665
ELMO2	6.68e-07	0.511	1
ELN	0.000139304	0.348	0.933246
ELOF1	6.44e-06	0.459	0.991609
ELP2	1.71e-05	0.367	0.946591
ELP3	3.23e-06	0.798	1
ELP4	3.34e-06	0.574	1
ELSPBP1	1.28e-06	0.827	1
EMB	4.57e-06	0.107	0.761665
EMG1	2.47e-06	0.952	1
EMILIN1	3.72e-05	0.34	0.931075
EML1	1.59e-07	0.906	1
EML3	3.83e-07	0.998	1
EMP3	4.77e-06	0.336	0.926519
EN1	2.13e-06	0.294	0.887033
ENAH	3.82e-05	0.687	1
ENC1	7.43e-06	0.082	0.761665
ENG	0.000171578	0.089	0.761665
ENO1	2.01e-05	0.377	0.951876
ENO2	3.72e-06	0.991	1
ENO3	2.69e-08	0.966	1
ENOX1	4.54e-06	0.794	1
ENPP1	3.33e-06	0.137	0.785244
ENSA	1.34e-06	0.971	1
ENTPD1	2.28e-06	0.527	1
ENTPD2	1.54e-07	0.974	1
ENTPD5	1.53e-06	0.843	1
ENY2	3.43e-08	0.779	1
EOMES	4.9e-05	0.156	0.805056
EP300	0.00243479	0.01	0.229891
EPAS1	0.000470605	0.166	0.805056
EPB41	4.73e-06	0.185	0.805056
EPB41L1	6.8e-05	0.352	0.935668
EPB41L3	1.04e-05	0.858	1
EPB42	5.24e-05	0.386	0.956062
EPB49	2.89e-06	0.965	1
EPC1	6.57e-06	0.213	0.818586
EPDR1	4.7e-07	0.997	1
EPHA2	0.000109677	0.392	0.956999
EPHA3	0.00121108	0.033	0.491514
EPHA4	0.000150574	0.232	0.843576
EPHA5	4.19e-05	0.435	0.979445
EPHA8	1.3e-05	0.233	0.845274
EPHB1	7.45e-05	0.16	0.805056
EPHB2	8.27e-05	0.486	1
EPHB3	1.92e-05	0.203	0.809067
EPHB4	3.87e-05	0.156	0.805056
EPM2A	0.000382068	0.088	0.761665
EPN2	5.55e-06	0.967	1
EPN3	6.62e-07	0.791	1
EPO	5.85e-05	0.421	0.968193
EPOR	5.31e-05	0.71	1
EPRS	1.86e-05	0.918	1
EPS15	5.04e-05	0.955	1
EPS8	3.66e-05	0.692	1
ERBB2	0.00139925	0.038	0.54182
ERBB2IP	0.000232836	0.161	0.805056
ERBB3	0.00122275	0.038	0.54182
ERBB4	0.000188382	0.198	0.808795
ERC1	1.84e-05	0.776	1
ERC2	6.67e-07	0.997	1
ERCC1	0.00136449	0.01	0.229891
ERCC2	0.00143739	0	0
ERCC4	0.00132715	0	0
ERCC5	0.00160833	0	0
ERCC6	0.00131506	0	0
ERCC8	0.00128354	0.007	0.182778
ERF	8.36e-06	0.459	0.991609
ERH	1.47e-05	0.546	1
ERMAP	3.51e-07	0.952	1
ERO1L	9.5e-06	0.325	0.921414
ERP27	7.53e-07	0.994	1
ESM1	1.33e-05	0.093	0.761665
ESR1	0.00210797	0.031	0.471691
ESR2	0.00142291	0.03	0.464268
ESRRA	0.00120181	0.032	0.48
ESRRG	0.000131848	0.22	0.827283
ETF1	0.000119238	0.184	0.805056
ETFA	1e-06	0.409	0.96652
ETFB	3.66e-05	0.409	0.96652
ETHE1	1.31e-06	0.286	0.88048
ETNK2	3.48e-07	0.557	1
ETS1	0.000164714	0.232	0.843576
ETV4	2.11e-05	0.131	0.776092
ETV5	1.49e-06	0.316	0.913033
ETV6	3.26e-06	0.972	1
EVC2	3.66e-07	0.993	1
EVI5	4.66e-06	0.388	0.956062
EVL	2.2e-05	0.614	1
EXO1	0.00132203	0	0
EXOC2	1.72e-06	0.999	1
EXOC3	1.28e-05	0.921	1
EXOC4	7.64e-06	0.988	1
EXOC5	2.33e-06	0.994	1
EXOC6	8.01e-07	1	1
EXOC7	1.86e-06	0.995	1
EXOC8	2.24e-06	1	1
EXOSC1	4.79e-05	0.402	0.963252
EXOSC10	0.000113045	0.479	1
EXOSC2	3.71e-05	0.605	1
EXOSC4	3.13e-05	0.875	1
EXOSC5	3.47e-05	0.775	1
EXOSC6	3.49e-05	0.848	1
EXOSC7	1.88e-05	0.804	1
EXOSC9	2.19e-05	0.76	1
EXT1	4.91e-06	0.334	0.926519
EXT2	1.04e-05	0.334	0.926519
EYA2	4.67e-06	0.938	1
EYA3	4.71e-07	0.999	1
EZH2	0.000117406	0.482	1
F10	0.000117196	0.501	1
F11	1.78e-05	0.631	1
F12	0.000156286	0.146	0.798595
F13A1	0.00120823	0.025	0.402602
F2	0.00155713	0.022	0.37727
F2R	2.93e-05	0.606	1
F2RL1	2.64e-05	0.274	0.868962
F2RL2	2.06e-05	0.721	1
F2RL3	1.95e-05	0.301	0.8958
F3	4.91e-06	0.576	1
F5	0.0012049	0.059	0.718532
F7	9.26e-06	0.626	1
FA2H	1.45e-06	0.997	1
FABP1	1.74e-05	0.114	0.761665
FABP3	4.13e-10	0.991	1
FABP4	4.53e-05	0.384	0.956062
FABP6	0	0.232	0.843576
FADD	0.000263996	0.13	0.776092
FAM100A	2.24e-07	1	1
FAM101A	5.34e-06	0.124	0.77211
FAM103A1	7.66e-07	0.76	1
FAM113A	4.88e-07	0.945	1
FAM115A	9.75e-07	1	1
FAM118B	7.4e-06	0.193	0.805056
FAM120B	1.7e-06	0.594	1
FAM124A	6.84e-08	1	1
FAM124B	8.99e-07	1	1
FAM131A	2.25e-07	0.899	1
FAM134A	3.7e-06	0.492	1
FAM46C	7.94e-06	0.228	0.841081
FAM48A	2.26e-07	1	1
FAM50B	1.85e-06	0.284	0.880392
FAM57A	1.47e-06	0.561	1
FAM69B	0	0.155	0.805056
FAM71C	3.36e-07	0.691	1
FAM86A	2.43e-07	0.741	1
FAM98A	2.67e-05	0.67	1
FANCA	0.00142972	0	0
FANCC	0.00148444	0	0
FANCD2	0.00196563	0	0
FANCE	0.00147856	0	0
FANCF	0.00144399	0	0
FANCG	0.001576	0	0
FANCL	0.00144095	0.002	0.0733526
FANCM	0.00132749	0	0
FAP	4.13e-05	0.101	0.761665
FARP1	1.87e-07	0.834	1
FARP2	5.38e-06	0.702	1
FARSA	0	0.183	0.805056
FAS	0.0012072	0.009	0.219635
FASLG	0.00135984	0.001	0.0409355
FASTK	2.83e-06	0.973	1
FBL	1.03e-05	0.796	1
FBLIM1	6.81e-07	0.945	1
FBLN1	4.81e-05	0.52	1
FBLN5	0.000369621	0.152	0.805056
FBN2	0.000182046	0.176	0.805056
FBXL12	5.6e-05	0.229	0.842322
FBXL6	1.44e-06	0.534	1
FBXO11	1.43e-05	0.24	0.850251
FBXO18	1.24e-05	0.234	0.845518
FBXO2	7.22e-06	0.232	0.843576
FBXO28	2.64e-06	0.553	1
FBXO32	3.46e-06	0.188	0.805056
FBXO33	6.04e-06	0.334	0.926519
FBXO38	0	0.166	0.805056
FBXO4	1.43e-05	0.147	0.799927
FBXO5	7.75e-06	0.227	0.841081
FBXW5	4.53e-05	0.117	0.764537
FBXW7	0.00122166	0.035	0.511694
FBXW8	2.15e-06	0.701	1
FCER1A	3.18e-05	0.832	1
FCER1G	2.86e-05	0.844	1
FCER2	3.57e-05	0.351	0.935668
FCGR2A	2.67e-05	0.339	0.929138
FCGR3A	7.04e-06	0.735	1
FCHSD2	4.91e-05	0.13	0.776092
FCN1	4.72e-05	0.222	0.829558
FCN2	0.00116172	0.019	0.346422
FCN3	0.00120193	0.021	0.36808
FDPS	1.97e-05	0.099	0.761665
FDX1	2.85e-06	0.803	1
FDXR	2.25e-05	0.457	0.991474
FECH	1.01e-05	0.114	0.761665
FEM1A	2.62e-07	0.572	1
FEN1	0.00127496	0	0
FER	4.91e-05	0.4	0.962092
FERD3L	4.04e-07	0.765	1
FES	7.21e-05	0.274	0.868962
FEZ1	0.000138053	0.668	1
FFAR1	4.13e-07	0.974	1
FFAR2	5.54e-07	0.948	1
FGA	0.000202304	0.124	0.77211
FGB	0.0001229	0.102	0.761665
FGF1	0.0013461	0.005	0.145528
FGF10	8.74e-06	0.539	1
FGF17	0.000129854	0.102	0.761665
FGF18	0.00124587	0	0
FGF19	5.12e-05	0.196	0.806498
FGF2	0.00140476	0.011	0.240672
FGF21	4.95e-06	0.256	0.866766
FGF23	0.00125678	0.002	0.0733526
FGF3	0.00127173	0	0
FGF4	0.000154906	0.087	0.761665
FGF5	0.00127296	0	0
FGF6	0.000107302	0.101	0.761665
FGF7	0.00130445	0	0
FGF8	0.00122543	0	0
FGF9	6.74e-05	0.101	0.761665
FGFBP1	9.26e-05	0.09	0.761665
FGFR1	0.00205844	0	0
FGFR1OP	5.5e-05	0.479	1
FGFR2	0.0016085	0.004	0.124412
FGFR3	0.00187911	0.005	0.145528
FGFR4	0.0017322	0	0
FGG	0.000131386	0.11	0.761665
FGR	3.43e-06	0.647	1
FH	2.13e-06	0.485	1
FHIT	3.5e-05	0.428	0.974752
FHL2	0.000118344	0.496	1
FHL3	3.99e-05	0.562	1
FHL5	5.14e-06	0.959	1
FHOD1	1.49e-05	0.654	1
FIBP	0.00122921	0.014	0.282898
FIZ1	7.72e-06	0.248	0.85893
FKBP1A	0.00042092	0.119	0.76754
FKBP1B	1.39e-07	0.998	1
FKBP2	0.00121514	0.094	0.761665
FKBP3	2.24e-05	0.192	0.805056
FKBP4	4.33e-05	0.366	0.945165
FKBP5	1.18e-05	0.402	0.963252
FKBP8	1.82e-05	0.182	0.805056
FKBPL	2.23e-06	0.673	1
FLAD1	2.21e-07	0.993	1
FLG	6.64e-06	0.345	0.933246
FLI1	1.28e-06	0.999	1
FLII	9.56e-06	0.838	1
FLNB	1.24e-05	0.571	1
FLNC	3.42e-05	0.708	1
FLOT1	5.85e-05	0.324	0.921414
FLOT2	1.77e-05	0.266	0.868777
FLT1	0.00131616	0.015	0.298354
FLT3	0.000223678	0.25	0.862561
FLT3LG	0.00116996	0.062	0.738068
FLT4	0.000172242	0.129	0.776092
FMNL1	4.28e-06	0.851	1
FMO1	9.13e-08	0.999	1
FMOD	2.86e-05	0.091	0.761665
FN1	0.00133781	0	0
FNBP1	6.73e-06	0.7	1
FNDC5	7.33e-06	0.324	0.921414
FNTA	8.71e-05	0.098	0.761665
FNTB	7.26e-05	0.135	0.78226
FOLR1	5.52e-07	0.401	0.962673
FOS	0.00169785	0.007	0.182778
FOSB	3.34e-05	0.263	0.868367
FOSL1	0.000404799	0.087	0.761665
FOSL2	2.57e-05	0.109	0.761665
FOXA1	0.00015484	0.381	0.953627
FOXA2	0.000101373	0.803	1
FOXA3	8.17e-06	0.262	0.868367
FOXC1	3.82e-07	0.66	1
FOXD3	9.28e-07	0.652	1
FOXE1	3.9e-06	0.262	0.868367
FOXF1	3.58e-07	0.708	1
FOXF2	8.81e-07	0.455	0.991474
FOXG1	2.88e-05	0.419	0.968155
FOXH1	1.09e-05	0.574	1
FOXJ3	2.45e-07	0.757	1
FOXK2	1.38e-06	0.298	0.891892
FOXL2	0.001159	0.051	0.652409
FOXM1	0.000125036	0.122	0.770239
FOXO1	0.00027248	0.118	0.765552
FOXO3	0.000210324	0.188	0.805056
FOXP1	2.18e-06	0.467	0.995336
FOXP2	2.21e-07	0.467	0.995336
FPR1	5.13e-06	0.752	1
FRAT1	1.93e-05	0.317	0.914673
FRAT2	6.25e-07	0.248	0.85893
FRK	5.48e-06	0.108	0.761665
FRMD6	3.37e-05	0.184	0.805056
FSCN1	1.67e-06	0.974	1
FSD1	7.72e-06	0.484	1
FSHR	0.00120942	0.037	0.531143
FST	0.00127889	0.004	0.124412
FSTL3	4.6e-05	0.186	0.805056
FTH1	6.39e-05	0.212	0.817217
FUBP1	1.92e-05	0.382	0.955
FURIN	0.00043389	0.344	0.933246
FUT4	2.08e-05	0.2	0.808795
FXN	3.51e-06	0.843	1
FXR1	1.05e-05	0.873	1
FXR2	4.42e-05	0.97	1
FXYD1	1.82e-06	0.996	1
FXYD6	4.92e-06	0.776	1
FYB	9.74e-05	0.257	0.867375
FYN	0.00170918	0.053	0.665911
FYTTD1	2.61e-06	0.14	0.793125
FZD1	0.000121227	0.227	0.841081
FZD10	8.57e-07	0.344	0.933246
FZD2	2.71e-05	0.305	0.89973
FZD3	1.93e-06	0.496	1
FZD5	5.47e-05	0.383	0.955993
FZD6	2.82e-07	0.387	0.956062
FZD7	4.09e-05	0.295	0.888782
FZD8	0.000181228	0.128	0.776092
FZD9	0.000256648	0.181	0.805056
FZR1	6.52e-05	0.671	1
G3BP2	1.02e-05	0.097	0.761665
GAA	2.37e-06	0.337	0.92686
GAB1	0.000109896	0.242	0.853999
GAB2	6.69e-05	0.577	1
GABARAP	9.66e-06	0.826	1
GABARAPL1	0.00120105	0.012	0.255503
GABBR1	8.61e-06	0.754	1
GABBR2	8.12e-07	0.954	1
GABPA	3.47e-05	0.114	0.761665
GABRA1	1.75e-06	0.964	1
GABRA4	2.17e-07	0.628	1
GABRB1	2.61e-06	0.27	0.868962
GABRB2	1.77e-06	0.867	1
GABRB3	1.21e-06	0.896	1
GABRD	1.89e-06	0.999	1
GABRG2	5.93e-06	0.97	1
GABRR1	1.11e-05	0.575	1
GABRR2	5.49e-06	0.635	1
GAD1	3.93e-06	0.742	1
GAD2	3.15e-06	0.65	1
GADD45A	0.00126934	0.001	0.0409355
GADD45B	0.00130429	0.002	0.0733526
GADD45G	0.00132392	0.006	0.166245
GAK	9.8e-05	0.126	0.776092
GAL	0	0.263	0.868367
GAL3ST4	7.88e-06	0.093	0.761665
GALNS	1.1e-06	0.403	0.963465
GALNT12	9.53e-07	0.387	0.956062
GALNT14	2.4e-06	0.387	0.956062
GALNT4	4.9e-07	0.555	1
GALT	0.00117932	0.022	0.37727
GANAB	1.67e-06	0.297	0.891421
GAP43	5.36e-06	0.962	1
GAPDH	7.24e-05	0.888	1
GARS	2.31e-05	0.488	1
GAS1	0.001166	0.042	0.578069
GAS7	3.9e-06	0.986	1
GAST	2.45e-07	0.687	1
GATA2	6.07e-05	0.465	0.995336
GATA3	4.63e-05	0.48	1
GATA4	1.47e-05	0.781	1
GATA5	1.16e-05	0.186	0.805056
GATA6	0.00116822	0.035	0.511694
GATAD2A	1.62e-05	0.626	1
GATAD2B	9.08e-06	0.65	1
GBA	1.22e-06	0.556	1
GBAS	3.07e-05	0.698	1
GBE1	0	0.182	0.805056
GBF1	2.28e-06	0.999	1
GBP2	0.000226515	0.098	0.761665
GBP3	1.16e-06	0.47	0.998946
GC	1.46e-05	0.671	1
GCA	2.54e-06	0.986	1
GCC1	1.39e-06	1	1
GCH1	2.69e-06	0.842	1
GCK	1.96e-05	0.892	1
GCKR	3.83e-06	0.958	1
GCLC	0	0.178	0.805056
GCM1	1.82e-06	0.626	1
GCSH	3.67e-05	0.16	0.805056
GDF15	1.03e-05	0.08	0.761665
GDF9	0.000149117	0.466	0.995336
GDI2	3.09e-06	0.83	1
GDNF	6.45e-05	0.308	0.900996
GEM	1.29e-06	1	1
GEMIN5	1.48e-05	0.879	1
GEMIN6	1.13e-05	0.909	1
GEMIN7	2.05e-05	0.834	1
GFAP	2.85e-05	0.44	0.984068
GFER	9.76e-06	0.273	0.868962
GFI1	2.48e-05	0.206	0.81266
GFI1B	0.000573953	0.324	0.921414
GFM1	2.12e-06	0.928	1
GFPT1	1.27e-06	0.843	1
GFRA1	6.1e-05	0.443	0.985912
[truncated: 4,346 more rows]
